# Supplementary material for: From patterned response dependency to structured covariate dependency: Entropy based categorical-pattern-matching
Source: PLOS journal article supplement (doi:10.1371/journal.pone.0198253), 2018-06-14

# S1 Box: Diagram of mutual conditional entropy

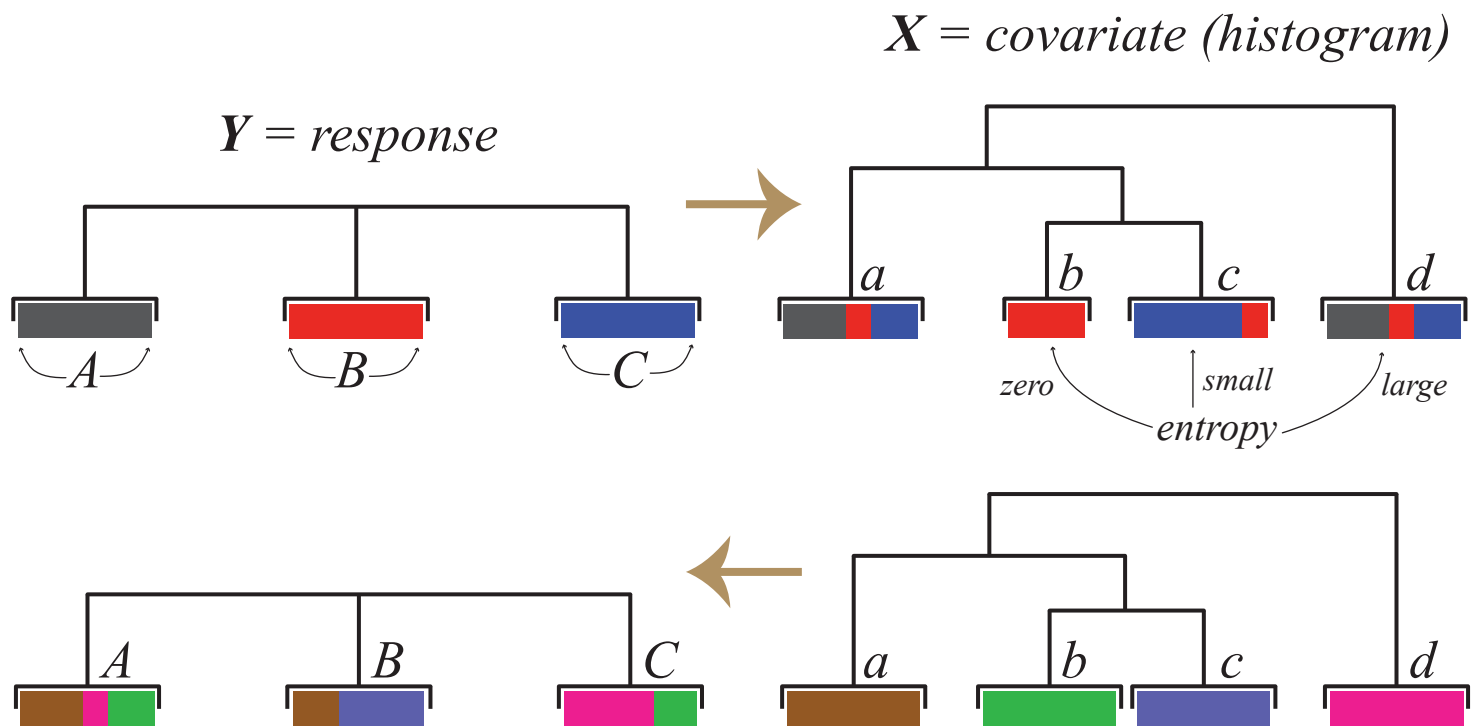

Subject's "Bivariate Coding"

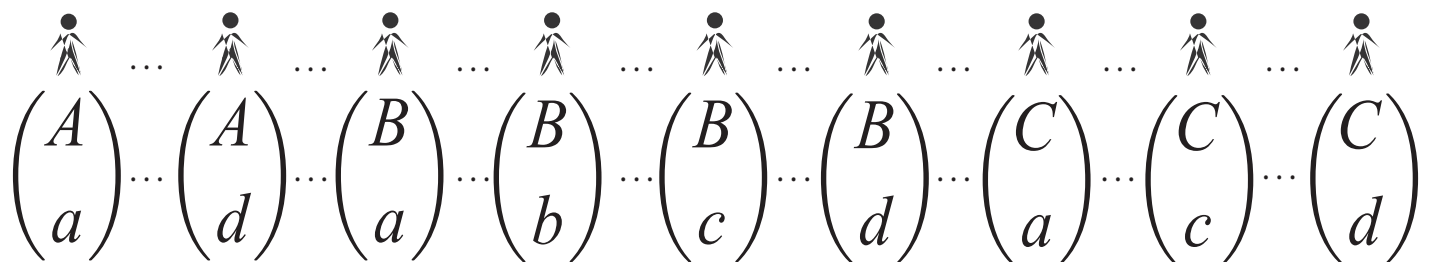

Conditional entropy (from  $Y \rightarrow X$ )

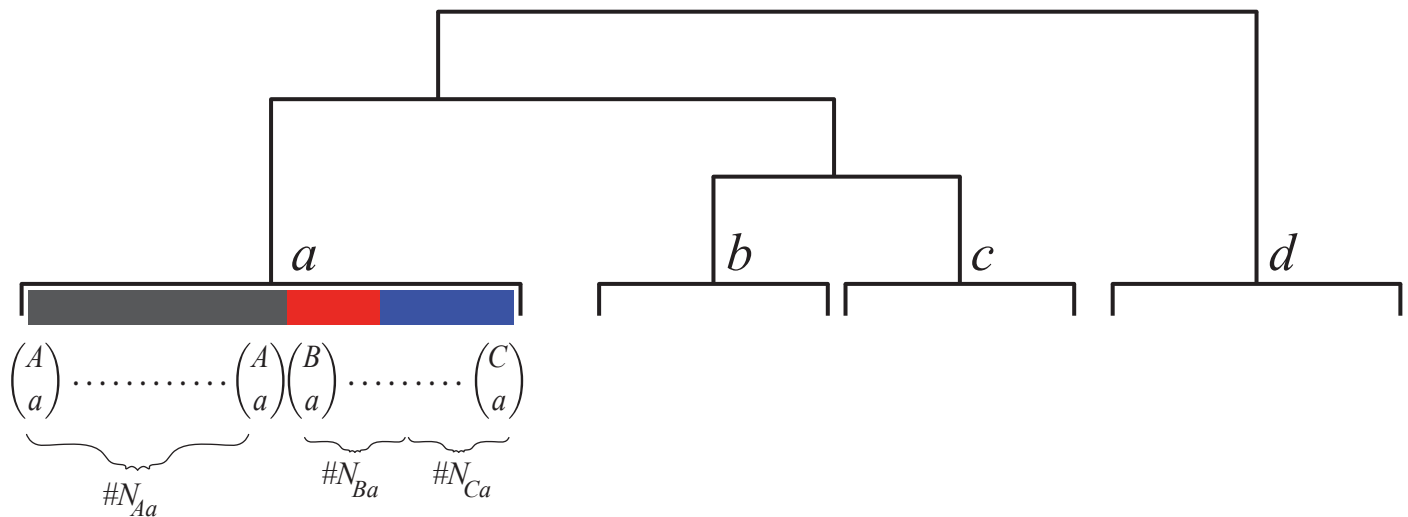

Supplement: S1 (10.1371/journal.pone.0198253.s001) [file journal.pone.0198253.s001]
